# Supplementary material for: Long-term regeneration and remodeling of the pig esophagus after circumferential resection using a retrievable synthetic scaffold carrying autologous cells
Source: PubMed Central journal article supplement (PMC5841275; doi:10.1038/s41598-018-22401-x), 2018-03-07
Supplement: 41598_2018_22401_MOESM1_ESM.pdf [file 41598_2018_22401_MOESM1_ESM.pdf]

# Long-term regeneration and remodeling of the pig esophagus after circumferential resection using a retrievable synthetic scaffold carrying autologous cells

## Authors

Saverio La Francesca<sup>1</sup>†, Johnathon M Aho<sup>2,3</sup>†, Matthew R Barron<sup>2</sup>, Ellen W Blanco<sup>2</sup>, Sherif Soliman<sup>1</sup>, Lena Kalenjian<sup>1</sup>, Ariel D Hanson<sup>1</sup>, Elisaveta Todorova<sup>1</sup>, Matthew Marsh<sup>1</sup>, KaLia Burnette<sup>1</sup>, Harout DerSimonian<sup>1</sup>, Robert D Odze<sup>4</sup>, and Dennis A Wigle<sup>2,3\*</sup>.

## Affiliations

1 Biostage, Inc., Holliston, MA 01746, USA.

2 Division of Thoracic Surgery, Department of Surgery, Mayo Clinic, Rochester, MN 55905, USA.

3 Department of Physiology and Biomedical Engineering, Mayo Clinic, Rochester, MN 55905, USA.

4 Department of Pathology, Harvard Medical School, Boston, MA 02115, USA.

\*To whom correspondence should be addressed: [aho.johnathon@mayo.edu](mailto:aho.johnathon@mayo.edu)

†Contributed equally to the work presented.

### Supplemental Figure 1

Structure of the normal Yucatan pig esophagus. (A) Representative image of a whole mount preparation of a Yucatan pig thoracic esophagus. Histological analyses were performed in 4 longitudinal samples per pig (n = 6 pigs), in a proximal to distal orientation. (B-I) Images of mucosal (B,C,F,G) and submucosal structures (D,E,H,I) stained with hematoxylin and eosin (left column) or Masson's trichrome (right column) in each of the 4 tissue domains. Scale bar = 100  $\mu$ m.

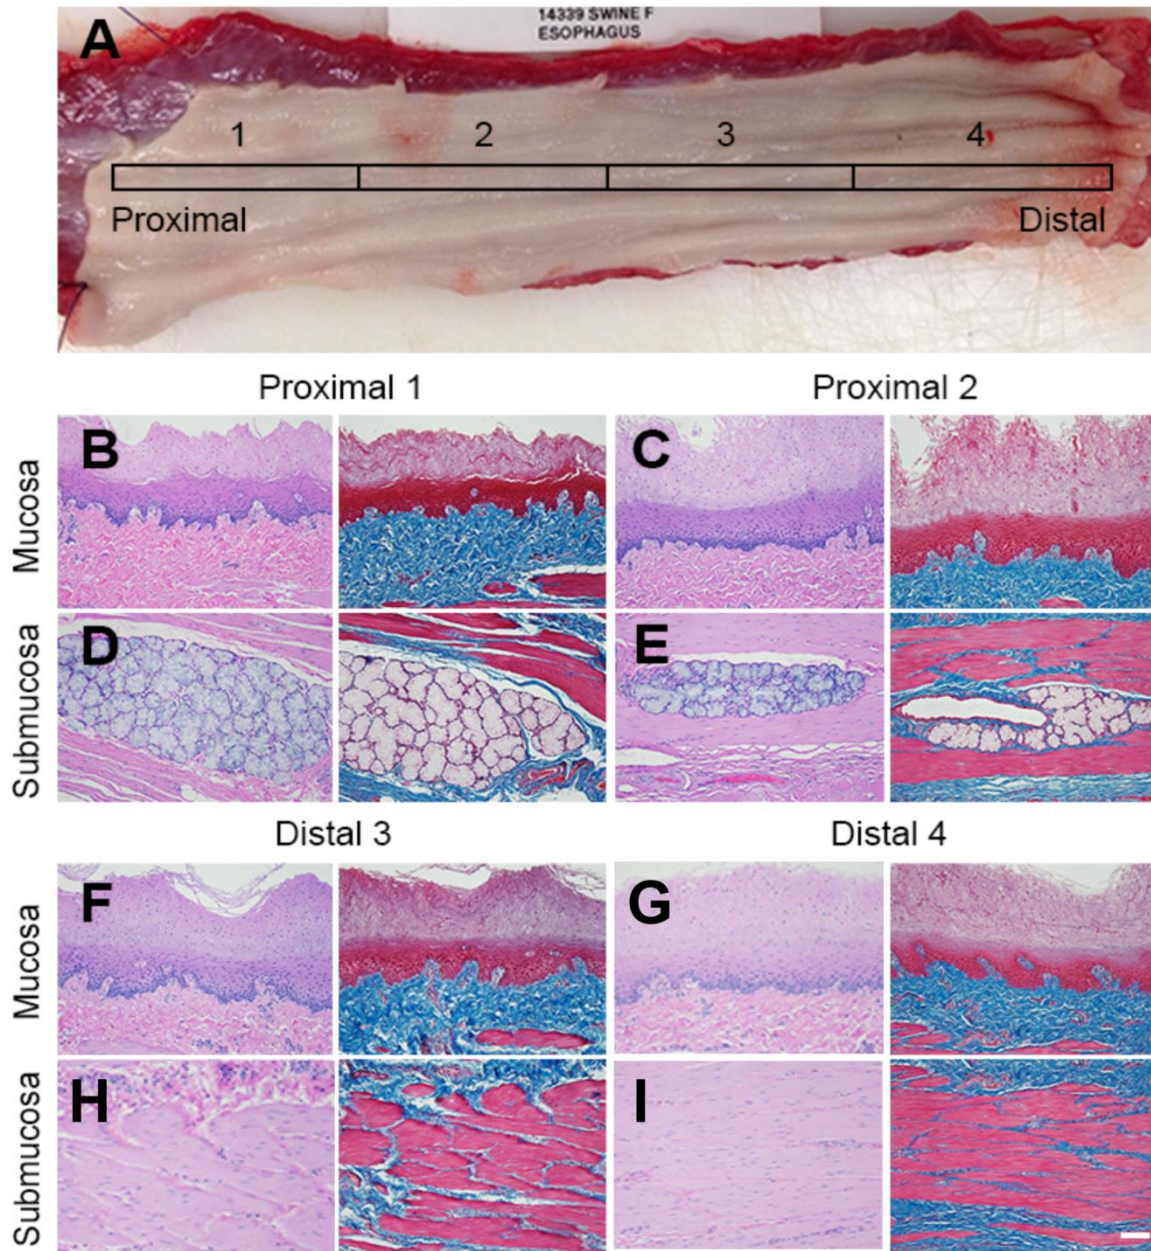



**Supplemental Figure 2**

Histological analysis at higher magnification of tissue from the pig esophagus at 2.5 months post-implantation of a cellularized scaffold. (A) Macroscopic image of excised esophagus (proximal left, distal right). Samples of tissue were excised to include the site of surgery, monitored by endoscopy, with adjacent distal and proximal tissues for histology (dotted box). (B-E) Representative images of hematoxylin and eosin (B, D) and Masson's trichrome (C, E) stained tissue sections. Scale bars: A = 6 cm, B, C, D and E = 200  $\mu$ m.

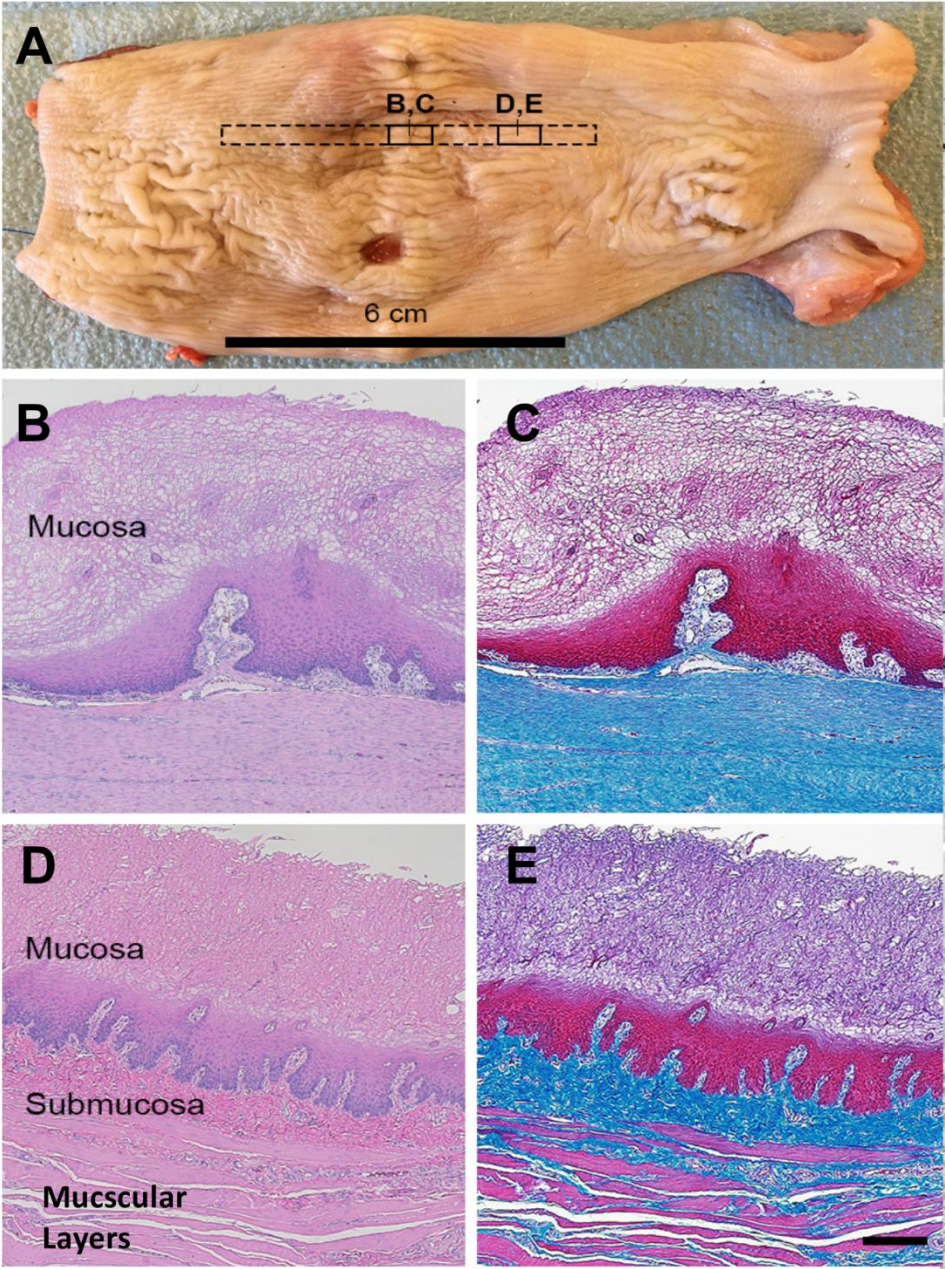

### Supplemental Figure 3

Representative positive and negative control sections of tissue for immunohistochemistry. (A,C,E,G,I,K,M) Positive control sections were from tissues known to contain immunoreactive cells and stained using the indicated primary antibody. (B,D,F,H,J,L,N) Negative control tissues used the same tissue as the positive controls but the primary antibody was omitted. A,B = artery/arteriole. C,D = blood vessels in smooth muscle tissue. E-J,M,N = esophagus. K,L = spleen. Scale bar = 60  $\mu$ m.

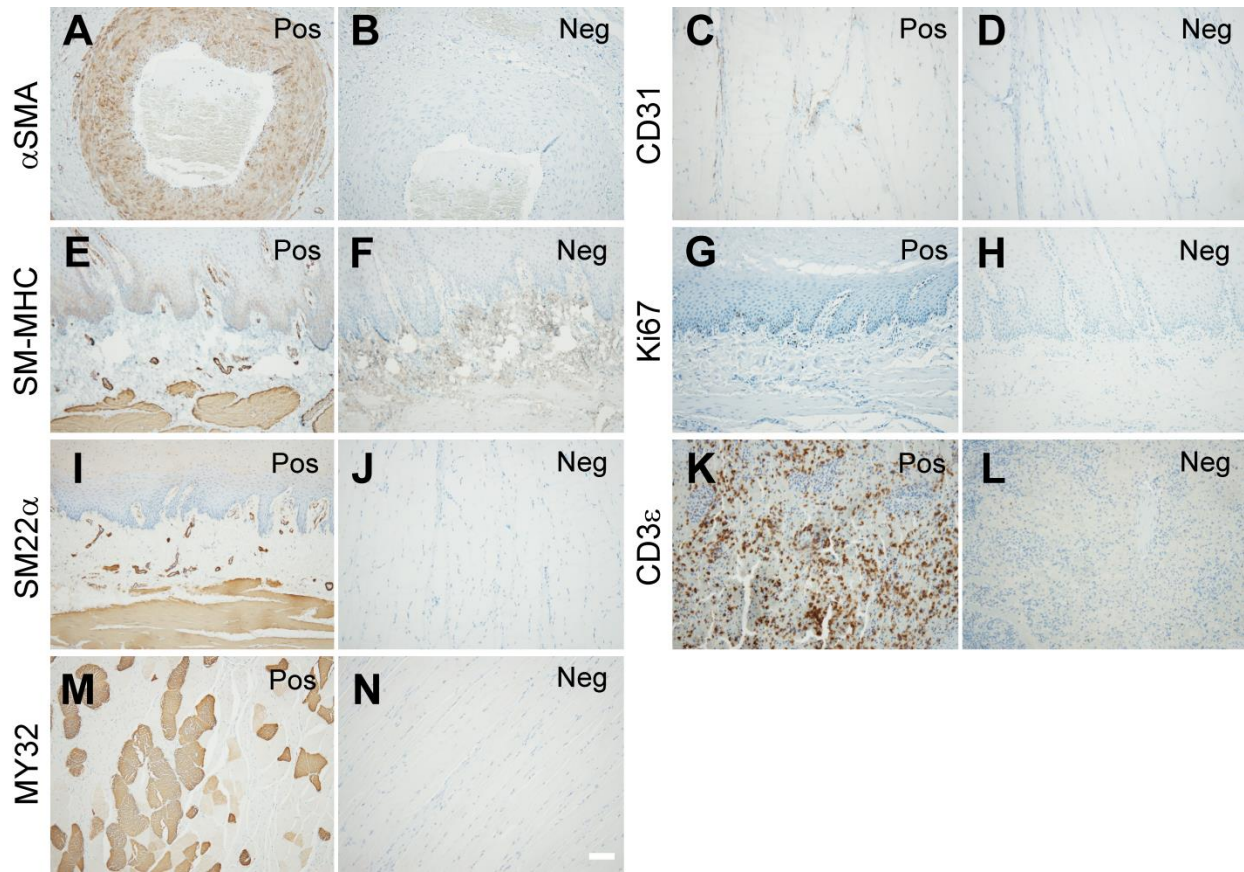

**Supplemental Table 1 - Antibodies for Flow cytometry.**

| <b>Isotype Controls</b> | <b>Color</b> | <b>Reagent Number</b> | <b>Company</b> | <b>Catalog #</b> | <b>Stock concentration</b> | <b>µL Ab /100µL</b> |
|-------------------------|--------------|-----------------------|----------------|------------------|----------------------------|---------------------|
| Ms IgG2b (CD14)         | AF594        | R133                  | BioLegend      | 400362           | 0.5 µg/µl                  | 1                   |
| Rat IgG2b (CD44)        | FITC         | R80                   | BioLegend      | 400634           | 0.05 µg/µl                 | 10                  |
| Rabbit IgG (CD45)       | AF594        | R135                  | LifeSpan       | LS-C149375       | 5 µg/µl                    | 0.4                 |
| Sheep IgG (CD73)        | FITC         | R136                  | LifeSpan       | LS-C149443       | 5 µg/µl                    | 0.5                 |
| Ms IgG1 (CD90)          | FITC         | R81                   | BioLegend      | 400122           | 0.1 µg/µl                  | 2.2                 |
| MS IgG2a (CD105)        | PE           | R79                   | BioLegend      | 400214           | 0.2 µg/µl                  | 3                   |
| Ms IgG1 (CD106)         | FITC         | R81                   | BioLegend      | 400122           | 0.1 µg/µl                  | 10                  |
| Ms IgG1 (CD146)         | AF647        | R138                  | BioLegend      | 400130           | 0.1 µg/µl                  | 5                   |
| Ms IgG1 (CD271)         | PE           | R134                  | BioLegend      | 400114           | 0.2 µg/µl                  | 1.25                |
| Ms IgG2b (SLA)          | FITC         | R78                   | BioLegend      | 400310           | 0.2 µg/µl                  | 5                   |

| <b>Antibody</b> | <b>Clone</b> | <b>Company</b> | <b>Catalog #</b> | <b>Species</b> | <b>Stock concentration</b> | <b>µL Ab /100µL</b> | <b>Color</b> |
|-----------------|--------------|----------------|------------------|----------------|----------------------------|---------------------|--------------|
| CD14            | 433423       | Novus          | FAB4597T         | Ms IgG2b       | 0.2 µg/µl                  | 2.5                 | AF594        |
| CD44            | IM7          | Biolegend      | 103027           | Rat IgG2b      | 0.2 µg/µl                  | 2.5                 | FITC         |
| CD45            | Poly Rab     | abcam          | ab10559          | Rab IgG        | 1 µg/µl                    | 2                   | AF594        |
| CD73            | Poly Sheep   | R&D Systems    | AF4488           | Sheep IgG      | 0.2 µg/µl                  | 12.5                | FITC         |
| CD90            | 5E10         | abcam          | ab139364         | Ms IgG1        | 0.055 mg/ml                | 4                   | FITC         |
| CD105           | MEM-229      | abcam          | ab53321          | Ms IgG2a       | 0.06 µg/µl                 | 10                  | PE           |
| CD106           | I.G11B1      | Lifespan       | LS-C58716        | Ms IgG1        | 0.1 µg/µl                  | 10                  | FITC         |
| CD146           | OJ79c        | AbD Serotec    | MCA2141 A647     | Ms IgG1        | 0.05 µg/µl                 | 10                  | AF647        |
| CD271           | ME20.4       | eBioscience    | 12-9400-41       | Ms IgG1        | 0.05 µg/µl                 | 5                   | PE           |
| SLA-II DR       | 2E9/13       | AbD Serotec    | MCA2314F         | Ms IgG2b       | 0.1 µg/µl                  | 10                  | FITC         |
